# Supplementary material for: Pre-crop Values From Satellite Images for Various Previous and Subsequent Crop Combinations
Source: Front Plant Sci. 2019 Apr 9;10:462. doi: 10.3389/fpls.2019.00462 (PMC6465551; doi:10.3389/fpls.2019.00462)
Supplement: Supplementary file 7 [file Table_7.DOCX]

Supplementary Material

Pre-Crop Values from Satellite Images for Various Previous and Subsequent Crop Combinations

Pirjo Peltonen-Sainio1*, Lauri Jauhiainen2, Eija Honkavaara3, Samantha Wittke3,4, Mika Karjalainen3, Eetu Puttonen3

*** Correspondence:** Corresponding Author: [pirjo.peltonen-sainio@luke.fi](mailto:pirjo.peltonen-sainio@luke.fi)


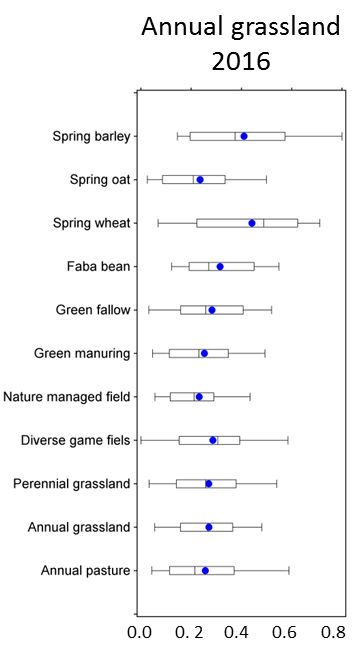


**Supplementary Figure 7.** Variation in the NDVI-gaps of different previous crops for annual grassland as the subsequent crop. The boxes indicate the upper and lower quartiles, with the whisker tops at the 90th percentile and the whisker bottoms at the 10th percentile. The solid lines inside the boxes are the medians and the blue dots indicate the mean value. Data only available for 2016.
